# Supplementary material for: Efficacy, Safety, and Tolerability of Inclisiran in Patients With Homozygous Familial Hypercholesterolemia: Results From the ORION-5 Randomized Clinical Trial
Source: PubMed Central journal article supplement (PMC10815002; doi:10.1161/circulationaha.122.063460), 2023-10-18
Supplement: cir-149-354-s001.pdf [file cir-149-354-s001.pdf]

## **SUPPLEMENTAL MATERIAL**

## Supplementary Appendix

### Inclusion criteria

1. Adult patients (aged  $\geq 18$  years) with confirmed diagnosis of HoFH by genetic testing or a clinical diagnosis based on a history of an untreated LDL-C concentration  $>500$  mg/dL (13 mmol/L) together with either xanthoma before 10 years of age or evidence of HeFH in both parents
2. Stable on a low-fat diet
3. Fasting central laboratory LDL-C concentration  $\geq 130$  mg/dL (3.4 mmol/L)
4. Triglyceride concentration  $<400$  mg/dL (4.5 mmol/L)
5. Patients on statins were to be receiving a maximally tolerated dose, defined as the maximum dose of statin that can be taken on a regular basis without intolerable AEs. Patients not receiving statins were required to have documented evidence of intolerance to at least two different statins.
6. Patients on LDL-C-lowering therapies (such as a statin and/or ezetimibe) were to be on a stable dose for  $\geq 30$  days before screening with no planned medication or dose change during study participation
7. No current or planned renal dialysis or renal transplantation
8. Patients on a documented regimen of LDL-C or plasma apheresis were allowed to continue the apheresis during the study, if needed

### Exclusion criteria

1. Any uncontrolled or serious disease, or any medical or surgical condition, that could have either interfered with participation in the clinical study, and/or put the patient at significant risk (according to the investigator's judgment) if he/she participated in the clinical study
2. Use of mipomersen or lomitapide therapy within 5 months of screening

3. Any underlying known disease or surgical, physical, or medical condition that, in the opinion of the investigator (or delegate) might have interfered with interpretation of the clinical study results
4. New York Heart Association (NYHA) class IV heart failure or last known left ventricular ejection fraction <25%
5. Major adverse cardiovascular event within 3 months prior to randomization
6. Uncontrolled severe hypertension: systolic blood pressure >180 mmHg or diastolic blood pressure >110 mmHg prior to randomization despite anti-hypertensive therapy
7. Active liver disease defined as any known current infectious, neoplastic, or metabolic pathology of the liver or unexplained elevations >3x the upper limit of normal (ULN) in alanine aminotransferase, aspartate aminotransferase, or >2x ULN total bilirubin at screening confirmed by a repeat abnormal measurement at least 1 week apart
8. Severe concomitant non-cardiovascular disease that carries the risk of reducing life expectancy to less than the duration of the trial
9. History of malignancy that required surgery (excluding local and wide-local excision), radiation therapy and/or systemic therapy during the 3 years prior to randomization
10. Pregnant or nursing females, or those who were of childbearing potential and unwilling to use at least one method of highly effective contraception (failure rate less than 1% per year) (e.g. combined oral contraceptives, barrier methods, approved contraceptive implant, long-term injectable contraception, or intrauterine device) for the entire duration of the study. Exemptions from this criterion:
  - a. Women >2 years postmenopausal (defined as  $\geq 1$  year since last menstrual period) and >55 years of age

b. Postmenopausal women (as defined above) and <55 years of age with a negative pregnancy test within 24 hours of enrollment

c. Women who were surgically sterilized  $\geq 3$  months prior to enrollment

11. Known history of alcohol and/or drug abuse within the last 5 years

12. Treatment with other investigational products or devices within 30 days or 5 half-lives of the screening visit, whichever was longer

13. Planned cardiac surgery or revascularization during the course of the study

14. Treatment (within 90 days of screening) with anti- PCSK9 therapies

15. Previous participation in the study

16. Hypersensitivity to any of the ingredients of inclisiran

**Table**

**Table S1: Mutations in LDLR and assigned functional status**

| <b>A<br/>ge</b> | <b>S<br/>ex</b> | <b>Treatme<br/>nt</b> | <b>Genotype</b> | <b>Gene<br/>affected</b> | <b>Mutation type</b>                            | <b>LDLR<br/>function</b> |
|-----------------|-----------------|-----------------------|-----------------|--------------------------|-------------------------------------------------|--------------------------|
| 25              | F               | Inclisiran            | Homozygous LDLR | <i>LDLR</i>              | c.681C>G (plus single allele PCSK9 c.599T>C)    | Null/Null                |
| 38              | M               | Inclisiran            | Homozygous LDLR | <i>LDLR</i>              | c.2054C>T (plus a single allele APOB c.1272G>T) | Null/Null                |
| 50              | M               | Placebo               | Homozygous LDLR | <i>LDLR</i>              | c.664T>C                                        | Non-Null/Null            |
| 53              | F               | Inclisiran            | Homozygous LDLR | <i>LDLR</i>              | c.1324T>C                                       | Non-Null/Null            |
| 29              | F               | Placebo               | Homozygous LDLR | <i>LDLR</i>              | c.1823C>T                                       | Non-Null/Null            |
| 37              | M               | Placebo               | Homozygous LDLR | <i>LDLR</i>              | c.1567G>A                                       | Non-Null/Null            |
| 32              | F               | Inclisiran            | Homozygous LDLR | <i>LDLR</i>              | c.1871_1873del                                  | Null/Null                |
| 39              | F               | Inclisiran            | Homozygous LDLR | <i>LDLR</i>              | c.97C>T                                         | Null/Null                |
| 30              | M               | Placebo               | Homozygous LDLR | <i>LDLR</i>              | c.1729T>C                                       | Non-Null/Null            |
| 38              | M               | Inclisiran            | Homozygous LDLR | <i>LDLR</i>              | c.1678A>T                                       | Non-Null/Null            |
| 37              | F               | Placebo               | Homozygous LDLR | <i>LDLR</i>              | c.1690A>G (plus a single allele APOB c.3427C>T) | Non-Null/Null            |
| 70              | F               | Inclisiran            | Homozygous LDLR | <i>LDLR</i>              | c.858C>A                                        | Non-Null/Null            |
| 48              | F               | Inclisiran            | Homozygous LDLR | <i>LDLR</i>              | c.2483A>G                                       | Null/Null                |
| 32              | F               | Placebo               | Homozygous LDLR | <i>LDLR</i>              | c.2483A>G                                       | Null/Null                |
| 35              | F               | Placebo               | Homozygous LDLR | <i>LDLR</i>              | c.941-?2140+?del                                | Null/Null                |
| 28              | M               | Inclisiran            | Homozygous LDLR | <i>LDLR</i>              | c.2483A>G                                       | Null/Null                |
| 49              | F               | Placebo               | Homozygous LDLR | <i>LDLR</i>              | c.2483A>G                                       | Null/Null                |
| 44              | M               | Inclisiran            | Homozygous LDLR | <i>LDLR</i>              | c.2483A>G                                       | Null/Null                |
| 31              | F               | Inclisiran            | Homozygous LDLR | <i>LDLR</i>              | c.2483A>G                                       | Null/Null                |

| <b>A<br/>ge</b> | <b>S<br/>ex</b> | <b>Treatme<br/>nt</b> | <b>Genotype</b>                  | <b>Gene<br/>affected</b> | <b>Mutation type</b>                         | <b>LDLR<br/>function</b> |
|-----------------|-----------------|-----------------------|----------------------------------|--------------------------|----------------------------------------------|--------------------------|
| 22              | F               | Inclisiran            | Homozygous<br>LDLRAP1            | <i>LDLRA<br/>P1</i>      | c.345-2A>G                                   | Non-<br>Null/Null        |
| 27              | F               | Placebo               | Homozygous<br>LDLRAP1            | <i>LDLRA<br/>P1</i>      | c.345-2A>G                                   | Non-<br>Null/Null        |
| 31              | M               | Inclisiran            | Homozygous<br>APOB               | <i>APOB</i>              | c.10579C>T                                   | Non-<br>Null/Null        |
| 34              | F               | Inclisiran            | Compound<br>heterozygous<br>LDLR | <i>LDLR</i>              | c.530C>T; c.1054T>C                          | Non-<br>Null/Null        |
| 41              | F               | Inclisiran            | Compound<br>heterozygous<br>LDLR | <i>LDLR</i>              | c.986G>A; c.1775G>A                          | Non-<br>Null/Null        |
| 35              | F               | Placebo               | Compound<br>heterozygous<br>LDLR | <i>LDLR</i>              | c.1246C>T;<br>c.940+3_940+6del               | Non-<br>Null/Null        |
| 29              | F               | Inclisiran            | Compound<br>heterozygous<br>LDLR | <i>LDLR</i>              | 330del; c.1327T>C                            | Non-<br>Null/Null        |
| 41              | F               | Inclisiran            | Compound<br>heterozygous<br>LDLR | <i>LDLR</i>              | c.681C>G; c.1285G>A                          | Null/Null                |
| 45              | M               | Placebo               | Compound<br>heterozygous<br>LDLR | <i>LDLR</i>              | c.268G>T; c.1951G>A                          | Non-<br>Null/Null        |
| 26              | M               | Inclisiran            | Compound<br>heterozygous<br>LDLR | <i>LDLR</i>              | c.564C>G; Gain on<br>Chr19:11230657-11234130 | Null/Null                |
| 34              | M               | Inclisiran            | Compound<br>heterozygous<br>LDLR | <i>LDLR</i>              | c.268G>A; c.1729T>C                          | Non-<br>Null/Null        |
| 42              | F               | Inclisiran            | Compound<br>heterozygous<br>LDLR | <i>LDLR</i>              | c.1567G>A; c.1988-<br>50_2007del70           | Non-<br>Null/Null        |
| 56              | M               | Inclisiran            | Compound<br>heterozygous<br>LDLR | <i>LDLR</i>              | c.622G>A; c.858C>A                           | Non-<br>Null/Null        |
| 50              | F               | Inclisiran            | Compound<br>heterozygous<br>LDLR | <i>LDLR</i>              | c.81C>G; c.590G>A                            | Non-<br>Null/Null        |
| 58              | M               | Placebo               | Compound<br>heterozygous<br>LDLR | <i>LDLR</i>              | c.858C>A; c.1690A>G                          | Non-<br>Null/Null        |

| <b>A<br/>ge</b> | <b>S<br/>ex</b> | <b>Treatme<br/>nt</b> | <b>Genotype</b>                       | <b>Gene<br/>affected</b>     | <b>Mutation type</b>  | <b>LDLR<br/>function</b> |
|-----------------|-----------------|-----------------------|---------------------------------------|------------------------------|-----------------------|--------------------------|
| 6<br>2          | M               | Inclisiran            | Compound<br>heterozygous<br>LDLR      | <i>LDLR</i>                  | c.769C>T; c.1765G>A   | Non-<br>Null/Null        |
| 2<br>8          | M               | Inclisiran            | Compound<br>heterozygous<br>LDLR      | <i>LDLR</i>                  | c.986G>A; c.1747C>T   | Non-<br>Null/Null        |
| 2<br>3          | M               | Placebo               | Compound<br>heterozygous<br>LDLR      | <i>LDLR</i>                  | c.682G>A; c.1747C>T   | Non-<br>Null/Null        |
| 6<br>8          | F               | Inclisiran            | Double<br>heterozygous<br>(LDLR+APOB) | <i>LDLR</i> ;<br><i>APOB</i> | c.1567G>A; c.10579C>T | Non-<br>Null/Null        |
| 6<br>6          | M               | Inclisiran            | Double<br>heterozygous<br>(LDLR+APOB) | <i>LDLR</i> ;<br><i>APOB</i> | c.268G>A; c.10579C>T  | Non-<br>Null/Null        |
| 4<br>8          | F               | Inclisiran            | Other<br>heterozygous                 | <i>LDLR</i>                  | c.1329G>A             | Non-<br>Null/Null        |
| 4<br>4          | F               | Inclisiran            | Other<br>heterozygous                 | <i>APOB</i>                  | c.10580G>A            | Non-<br>Null/Null        |
| 2<br>5          | F               | Placebo               | Other<br>heterozygous                 | <i>LDLR</i>                  | c.2416dupG            | Non-<br>Null/Null        |
| 4<br>7          | F               | Inclisiran            | Other<br>heterozygous                 | <i>LDLR</i>                  | c.1048C>T             | Non-<br>Null/Null        |
| 6<br>3          | F               | Inclisiran            | Other<br>heterozygous                 | <i>LDLR</i>                  | c.444T>G              | Non-<br>Null/Null        |
| 4<br>1          | F               | Placebo               | Other<br>heterozygous                 | <i>LDLR</i>                  | c.1322T>A             | Non-<br>Null/Null        |
| 6<br>4          | F               | Inclisiran            | Other<br>heterozygous                 | <i>LDLR</i>                  | c.501C>A              | Non-<br>Null/Null        |
| 6<br>2          | F               | Placebo               | Other<br>heterozygous                 | <i>LDLR</i>                  | c.1222G>A             | Non-<br>Null/Null        |
| 5<br>5          | F               | Placebo               | Other<br>heterozygous                 | <i>LDLR</i>                  | c.1186G>A             | Non-<br>Null/Null        |
| 3<br>2          | M               | Inclisiran            | Other<br>heterozygous                 | <i>LDLR</i>                  | c.1705+1G>A           | Non-<br>Null/Null        |
| 4<br>4          | M               | Placebo               | Other<br>heterozygous                 | <i>LDLR</i>                  | c.2416dupG            | Non-<br>Null/Null        |
| 5<br>6          | M               | Inclisiran            | Other<br>heterozygous                 | <i>APOB</i>                  | c.3337G>C             | Non-<br>Null/Null        |
| 3<br>4          | F               | Inclisiran            | None identified                       | -                            | -                     | Non-<br>Null/Null        |
| 5<br>0          | M               | Inclisiran            | None identified                       | -                            | -                     | Non-<br>Null/Null        |

| Age | Sex | Treatment  | Genotype        | Gene affected | Mutation type | LDLR function |
|-----|-----|------------|-----------------|---------------|---------------|---------------|
| 59  | M   | Placebo    | None identified | -             | -             | Non-Null/Null |
| 49  | F   | Inclisiran | None identified | -             | -             | Non-Null/Null |
| 56  | F   | Inclisiran | None identified | -             | -             | Non-Null/Null |

The data represents all randomized patients  
*APOB*, apolipoprotein B; F, female; *LDLR*, low-density lipoprotein receptor; *LDLRAP1*, low-density lipoprotein receptor adaptor protein 1; M, male

## Figures

**Figure S1: Study design**

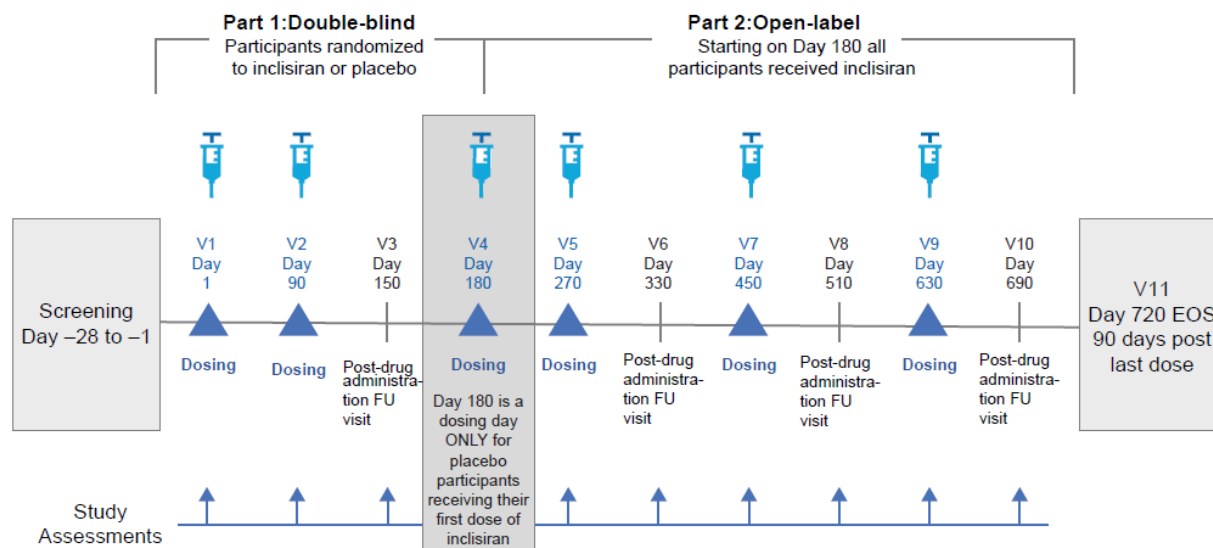

Part 1: Randomized 2:1 subcutaneous inclisiran sodium 300 mg versus placebo (1–6 months)

Part 2: Open-label subcutaneous inclisiran sodium 300 mg (6–24 months)

EOS, end of study; FU, follow-up; V, visit.



**Figure S2: Patient disposition (ITT population)**

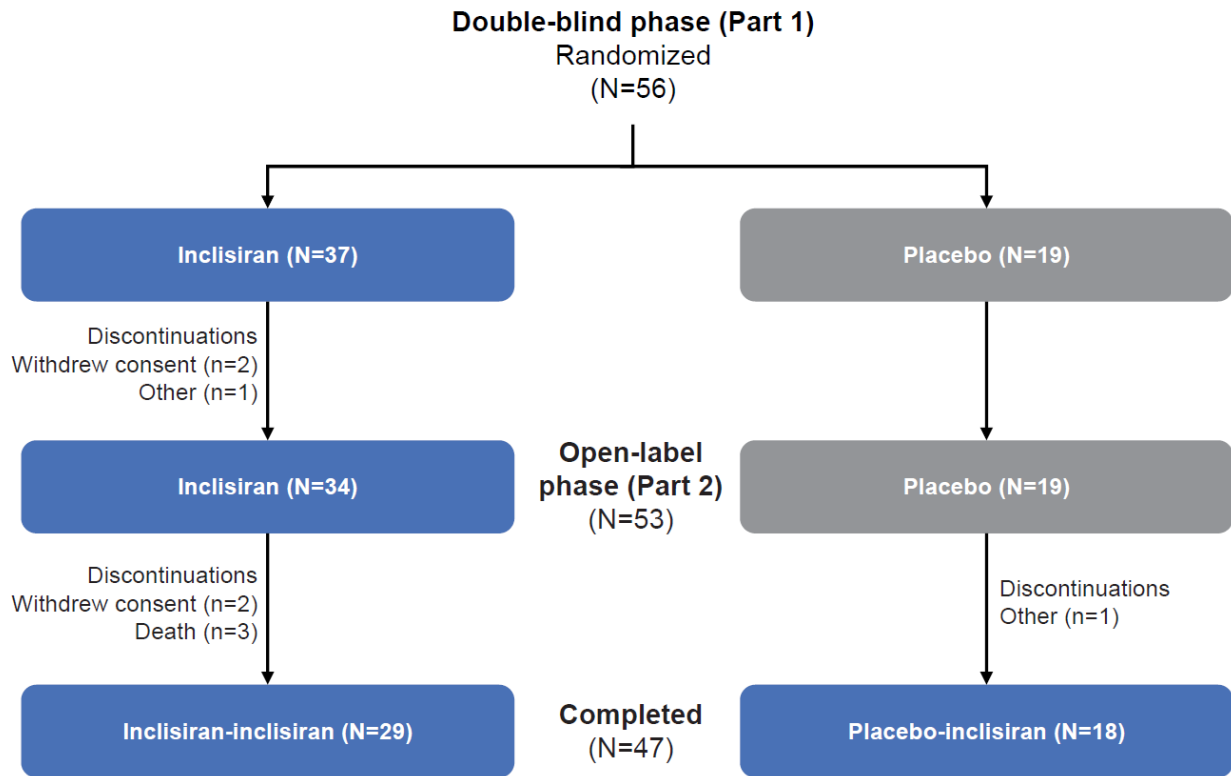

Part 1: Double blind, randomized 2:1 inclisiran sodium 300 mg versus placebo with maximally tolerated statins (1–6 months)

Part 2: Open-label inclisiran sodium 300 mg (6–24 months)

ITT, intent-to-treat; n, number of patients.

**Figure S3: Mean observed percentage change from baseline in PCSK9 by visit and treatment (Part 1; ITT population)**

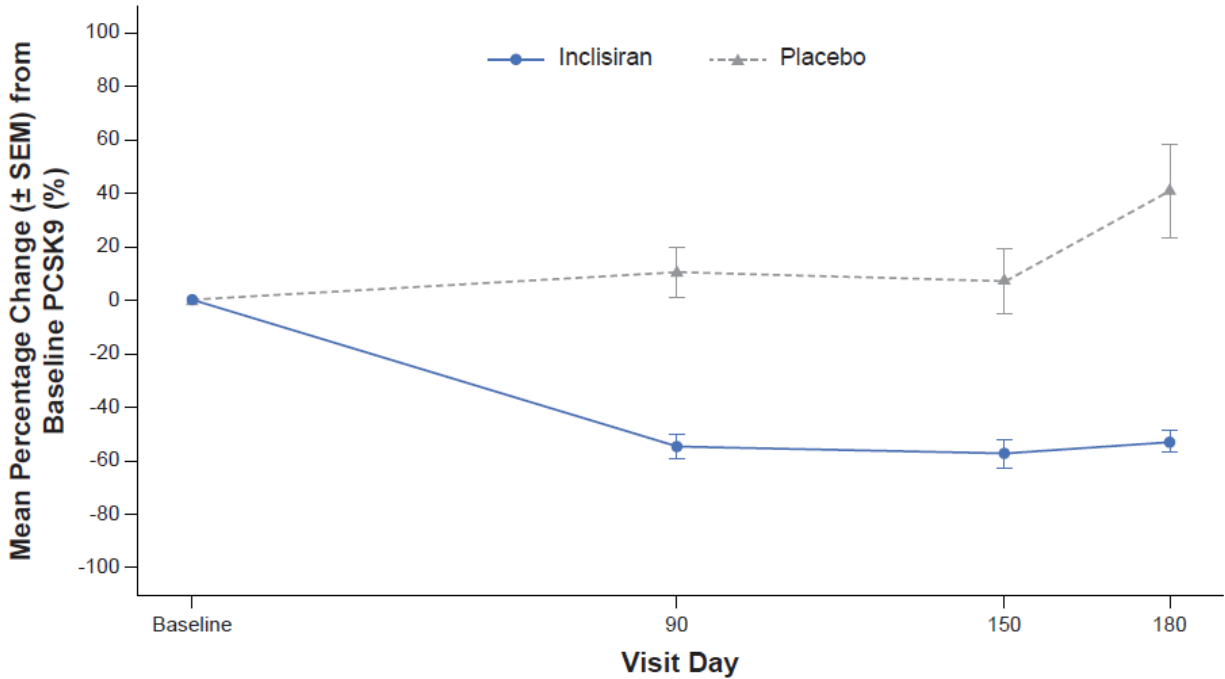

| No. of patients |    | 90 | 150 | 180 |
|-----------------|----|----|-----|-----|
| Inclisiran      | 37 | 37 | 34  | 31  |
| Placebo         | 19 | 19 | 18  | 19  |

ITT, intent-to-treat; PCSK9, proprotein convertase subtilisin/kexin type 9; SEM, standard error of mean.

**Figure Legends**

Figure S1: Study design

Figure S2: Patient disposition (ITT population)

Figure S3: Mean observed percentage change from baseline in PCSK9 by visit and treatment (Part 1; ITT population)
